# Supplementary material for: Investigation of leptin receptor rs1137101 G>A polymorphism with cancer risk: evidence from 35936 subjects
Source: PubMed Central journal article supplement (PMC6597850; doi:10.1042/bsr20182240), 2019-06-28

Begg's funnel plot with pseudo 95% confidence limits

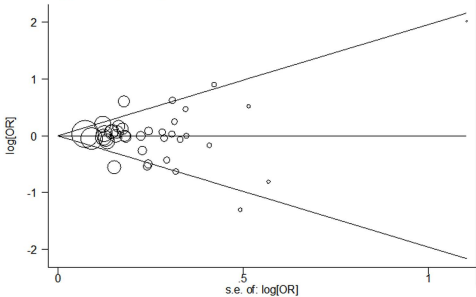

Meta-analysis estimates, given named study is omitted

| Lower CI Limit    ○ Estimate    | Upper CI Limit

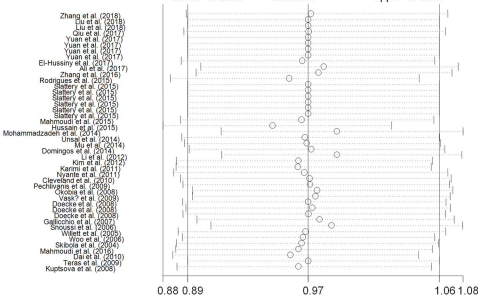

Supplement: bsr20182240_Supp1.pdf [file bsr20182240_Supp1.pdf]
